# Supplementary material for: Healthcare Utilization and All-Cause Premature Mortality in Hungarian Segregated Roma Settlements: Evaluation of Specific Indicators in a Cross-Sectional Study
Source: MDPI journal article supplement (doi:10.3390/ijerph15091835), 2018-08-24
Supplement: s1 [file s1 › Certificate American Journal Experts.pdf]

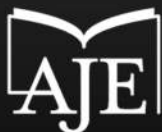

# EDITORIAL CERTIFICATE

This document certifies that the manuscript listed below was edited for proper English language, grammar, punctuation, spelling, and overall style by one or more of the highly qualified native English speaking editors at American Journal Experts.

## Manuscript title:

Special health care utilization pattern with elevated costs and high risk of premature death among adults living in segregated Roma settlements

## Authors:

János Sándor, Anita Pálincás, Ferenc Vincze, Nóra Kovács, Valéria Sipos, László Kőrösi, Zsófia Falusi, László Pál, Gergely Fűrjes, Magor Papp, Róza Ádány

## Date Issued:

July 9, 2018

## Certificate Verification Key:

C6AC-E2D1-8658-F402-39CC

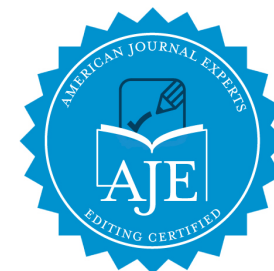

This certificate may be verified at [www.aje.com/certificate](http://www.aje.com/certificate). This document certifies that the manuscript listed above was edited for proper English language, grammar, punctuation, spelling, and overall style by one or more of the highly qualified native English speaking editors at American Journal Experts. Neither the research content nor the authors' intentions were altered in any way during the editing process. Documents receiving this certification should be English-ready for publication; however, the author has the ability to accept or reject our suggestions and changes. To verify the final AJE edited version, please visit our verification page. If you have any questions or concerns about this edited document, please contact American Journal Experts at [support@aje.com](mailto:support@aje.com).
